# Supplementary material for: Antibacterial efficacy of low-dosage silver nanoparticle–sodium alginate–chitosan nanocomposite films against pure and clinical acne strains
Source: Royal Society of Chemistry journal article supplement (doi:10.1039/d4ra05180g), 2024-01-01
Supplement: d4ra05180g1.pdf [file d4ra05180g1.pdf]

## Supplementary Information

### Antibacterial Efficacy of Low-Dosage Silver Nanoparticle-Sodium Alginate-Chitosan Nanocomposite Films Against Pure and Clinical Acne Strains

Bao Lam Thai Tran<sup>a,†</sup>, Thanh Van Vo<sup>b,†</sup>, Teng-Ping Chu<sup>c,d</sup>, Duong Thai Bach<sup>a</sup>, Thai Quang Nguyen<sup>a</sup>, Vy Thi Thuy Tran<sup>b</sup>, Phuong Hong Bao Luu<sup>e</sup>, Hieu Hoang Duong<sup>b</sup>, Nhi Hoang Nguyen<sup>f</sup>, Gai Thi Le<sup>a</sup>, Thu Thi Tran<sup>g</sup>, Khanh Nguyen Tuong Tran<sup>h</sup>, Le Thi Cam Tuyen<sup>h</sup>, Truong Ngoc Dinh<sup>i,j</sup>, Ngo Ngoc Uyen<sup>i</sup>, Tram Thi Thu Nguyen<sup>j,k</sup>, Ngoc-Van Thi Nguyen<sup>b</sup>, Kien Trung Nguyen<sup>a</sup>, Le Thi Nhu Tran<sup>a,\*</sup>, Phuoc Huu Le<sup>c,d,\*</sup>

<sup>a</sup> Faculty of Medicine, Can Tho University of Medicine and Pharmacy, 179 Nguyen Van Cu Street, Can Tho City, Vietnam

<sup>b</sup> Faculty of Pharmacy, Can Tho University of Medicine and Pharmacy, 179 Nguyen Van Cu Street, Can Tho City, Vietnam

<sup>c</sup> Center for Plasma and Thin Film Technologies, Ming Chi University of Technology, New Taipei City 243303, Taiwan

<sup>d</sup> International Ph.D. Program in Plasma and Thin Film Technology, Ming Chi University of Technology, New Taipei City 243303, Taiwan

<sup>e</sup> Faculty of Pharmacy, University of Medicine and Pharmacy at Ho Chi Minh City, 41-43 Dinh Tien Hoang Street, Vietnam

<sup>f</sup> Faculty of Public Health, Can Tho University of Medicine and Pharmacy, 179 Nguyen Van Cu Street, Can Tho City, Vietnam

<sup>g</sup> Faculty of Traditional Medicine, Can Tho University of Medicine and Pharmacy, 179 Nguyen Van Cu Street, Can Tho City, Vietnam

<sup>h</sup> Faculty of Chemical Engineering, Can Tho University–3/2 Street, Can Tho City, Vietnam

<sup>i</sup> Department of Physics and Biophysics, Faculty of Basic Sciences, Can Tho University of Medicine and Pharmacy, 179 Nguyen Van Cu Street, Can Tho City, Vietnam

<sup>j</sup> Department of Biomedical Engineering, Faculty of Basic Sciences, Can Tho University of Medicine and Pharmacy, 179 Nguyen Van Cu Street, Can Tho City, Vietnam

<sup>k</sup> Department of Chemistry, Faculty of Basic Sciences, Can Tho University of Medicine and Pharmacy, 179 Nguyen Van Cu Street, Can Tho City, Vietnam

<sup>†</sup>These two authors contributed equally to this study.

\* **Corresponding author's e-mail:** [tttle@ctump.edu.vn](mailto:tttle@ctump.edu.vn) (T.T.N.L) and [phle@mail.mcut.edu.tw](mailto:phle@mail.mcut.edu.tw) (P.H.L)

## Contents

|                                                                                                     |    |
|-----------------------------------------------------------------------------------------------------|----|
| <b>Supplementary Methods</b> .....                                                                  | 3  |
| 1. Identification of bacterial strain.....                                                          | 3  |
| 2. Qualify phase of antibacterial activity test .....                                               | 7  |
| 3. Quantify phase of antibacterial activity test.....                                               | 8  |
| 4. General and clinical characteristics of the study population .....                               | 9  |
| 5. Antibacterial activity of silver nanoparticles-sodium alginate-chitosan nanocomposite films..... | 11 |

## Figures and Tables

|                                                                                                                                                                                        |    |
|----------------------------------------------------------------------------------------------------------------------------------------------------------------------------------------|----|
| Graph S1. Biochemical identification of bacterial strains.....                                                                                                                         | 6  |
| Figure S1. Quantify the antibacterial activity of the nanomaterials on bacterial strains.....                                                                                          | 7  |
| Figure S2. The serial dilution method uses 96-well agar plates to determine the minimum inhibitory concentration (MIC).....                                                            | 8  |
| Figure S3. Quantify the minimal inhibitory concentration (MIC) of silver nanoparticles-, and silver nanoparticles-chitosan- solutions through the serial dilution method.....          | 11 |
| Figure S4. Quantify the minimal inhibitory concentration value of silver nanoparticle-sodium alginate-chitosan nanocomposite films through the Kirby-Bauer disc diffusion method. .... | 12 |
| Table S1 Clinical characteristics of the study population. ....                                                                                                                        | 9  |

## Supplementary Methods

### 1. Identification of bacterial strain

**Identification of bacterial strains** was conducted according to the Vietnam government's guidelines for clinical microbiology techniques and the specific microbiological testing characteristics of *C. acnes* [1, 2]. Clinical bacteria were collected and stored in 20 mL of Brain Heart Infusion (BHI) to maintain an anaerobic environment for *C. acnes*, while other bacteria were stored aerobically [1]. All microbiological testing adhered strictly to these government guidelines.

#### **Gram staining procedure [3]:**

1. Smear bacteria onto a slide and tilt it at a 45° angle.
2. Coat the bacterial smear with gentian violet for 10 seconds, then rinse with gently running water.
3. Fix the smear with Lugol's iodine for 20 seconds, and wash briefly with 90% alcohol for 5 seconds.
4. Rinse the slide again with water to remove any remaining alcohol.
5. Cover the smear with safranin red for 10 seconds, rinse with water, and blot the slide dry.
6. Observe the slide under a microscope at 4x magnification. Then, add one drop of mineral oil to the slide and observe under the 100x objective lens.
7. Record the type of bacteria and their Gram stain results.

#### **Catalase Test [1]:**

1. Take a few bacterial colonies and place them on a slide.
2. Add a drop of 3% H<sub>2</sub>O<sub>2</sub> (hydrogen peroxide) onto the bacterial colonies.
3. Observe for the formation of bubbles, which indicates a positive catalase reaction (+).

#### **Coagulase 10s-Test [1]:**

1. Apply a drop of sterile water onto a slide.
2. Collect a few bacterial colonies and mix them with the sterile water to create a bacterial suspension.
3. Add a small amount of plasma to the suspension and mix well.
4. Observe within 10 seconds. The appearance of white particles indicates a positive coagulase reaction (+).

#### **Cytochrome Oxidase Test [1]:**

1. Use a sterile loop to collect a bacterial colony.
2. Spread the colony on an oxidase test strip or paper plate impregnated with 1% Tetramethyl-p-phenylenediamine.
3. A positive test is indicated if the paper turns purple-black within 10-20 seconds.

**Biochemical Activity Test on Kligler Iron Agar (KIA) Medium [4]:**

1. Use a sterilized straight inoculation rod to collect bacteria from a prepared Eppendorf tube (0.5 McFarland standard).
2. Inoculate the agar by streaking the slant surface in a zig-zag pattern.
3. Insert the inoculation rod vertically into the agar to the bottom.
4. Incubate the inoculated agar at 37°C.
5. Read the results:
  - Lactose Fermentation (-): The slant is red and the butt is yellow.
  - Lactose Fermentation (+): Both the slant and butt are yellow.
  - No Fermentation: Both the slant and butt are red.
  - H<sub>2</sub>S Production (+): Black precipitate appears in the agar.
  - Gas Production (+): Formation of bubbles or cracks in the agar indicates gas production.

**Activity Test on Sulfur, Indole, Motility (SIM) Medium [5]:**

1. Use a sterilized straight inoculation rod to collect bacteria from a prepared Eppendorf tube (0.5 McFarland standard).
2. Insert the inoculation rod straight into the center of the SIM agar without touching the bottom.
3. Incubate the inoculated medium at 37°C.
4. Read the results:
  - H<sub>2</sub>S Production (+): Black precipitate appears in the test tube.
  - Indole Production (+): A red ring forms at the surface of the medium after adding Kovac's reagent.
  - Motility (+): Growth radiates from the inoculation line, indicating bacterial movement.

**Gelatin Liquefaction Test [6]:**

1. Use a sterilized straight rod to collect bacteria from a prepared Eppendorf tube (0.5 McFarland standard).
2. Insert the inoculation rod straight into the center of the gelatin medium without touching the bottom.
3. Incubate the inoculated gelatin medium at 37°C.
4. Determine the result: Gelatin liquefaction is positive (+) if the gelatin medium has liquefied after incubation.

**Nitrate Reduction Test [1]:**

1. Grow the bacteria in a medium containing 0.1% potassium nitrate.
2. After incubation, add 0.1 ml of a reagent solution prepared by mixing solution A (8g Sulfanilic acid in 1 liter of acetic acid) and solution B (6ml N,N-dimethyl-1-naphthylamine in 1 liter of acetic acid) in a 1:1 ratio.
3. A positive result (+) is indicated by the solution turning red within a few minutes.

**Other Biochemical Tests [1, 7]:**

- Citrate Test: Inoculate the bacteria onto citrate agar. A positive result (+) is indicated by a color change from green to blue.

- Urea Test: Inoculate the bacteria into urea broth. A positive result (+) is indicated by a color change from yellow to red.
- Voges-Proskauer (VP) Test: Conduct the VP test to detect acetoin production. A positive result (+) is indicated by the development of a red color.
- Methyl Red (MR) Test: Inoculate the bacteria in MR-VP broth and add methyl red indicator. A positive result (+) is indicated by a color change from yellow to red.
- Lysine Decarboxylase Test: Inoculate the bacteria in lysine decarboxylase broth. A positive result (+) is indicated by the retention of the purple color.

**Antibiotic Disk Diffusion Tests:**

- Perform the agar disk diffusion method using antibiotic disks for Novobiocin, Bacitracin, and Optochin.
- Measure the diameter of the zone of inhibition around each disk.
- Sensitivity criteria:
  - Novobiocin: Sensitive if the zone diameter is  $\geq 16$  mm.
  - Optochin: Sensitive if the zone diameter is  $\geq 14$  mm.
  - Bacitracin: Sensitive if a zone of inhibition is present.

Graph S1 below shows the implementation instructions of the biochemical tests to identify the bacterial strains.

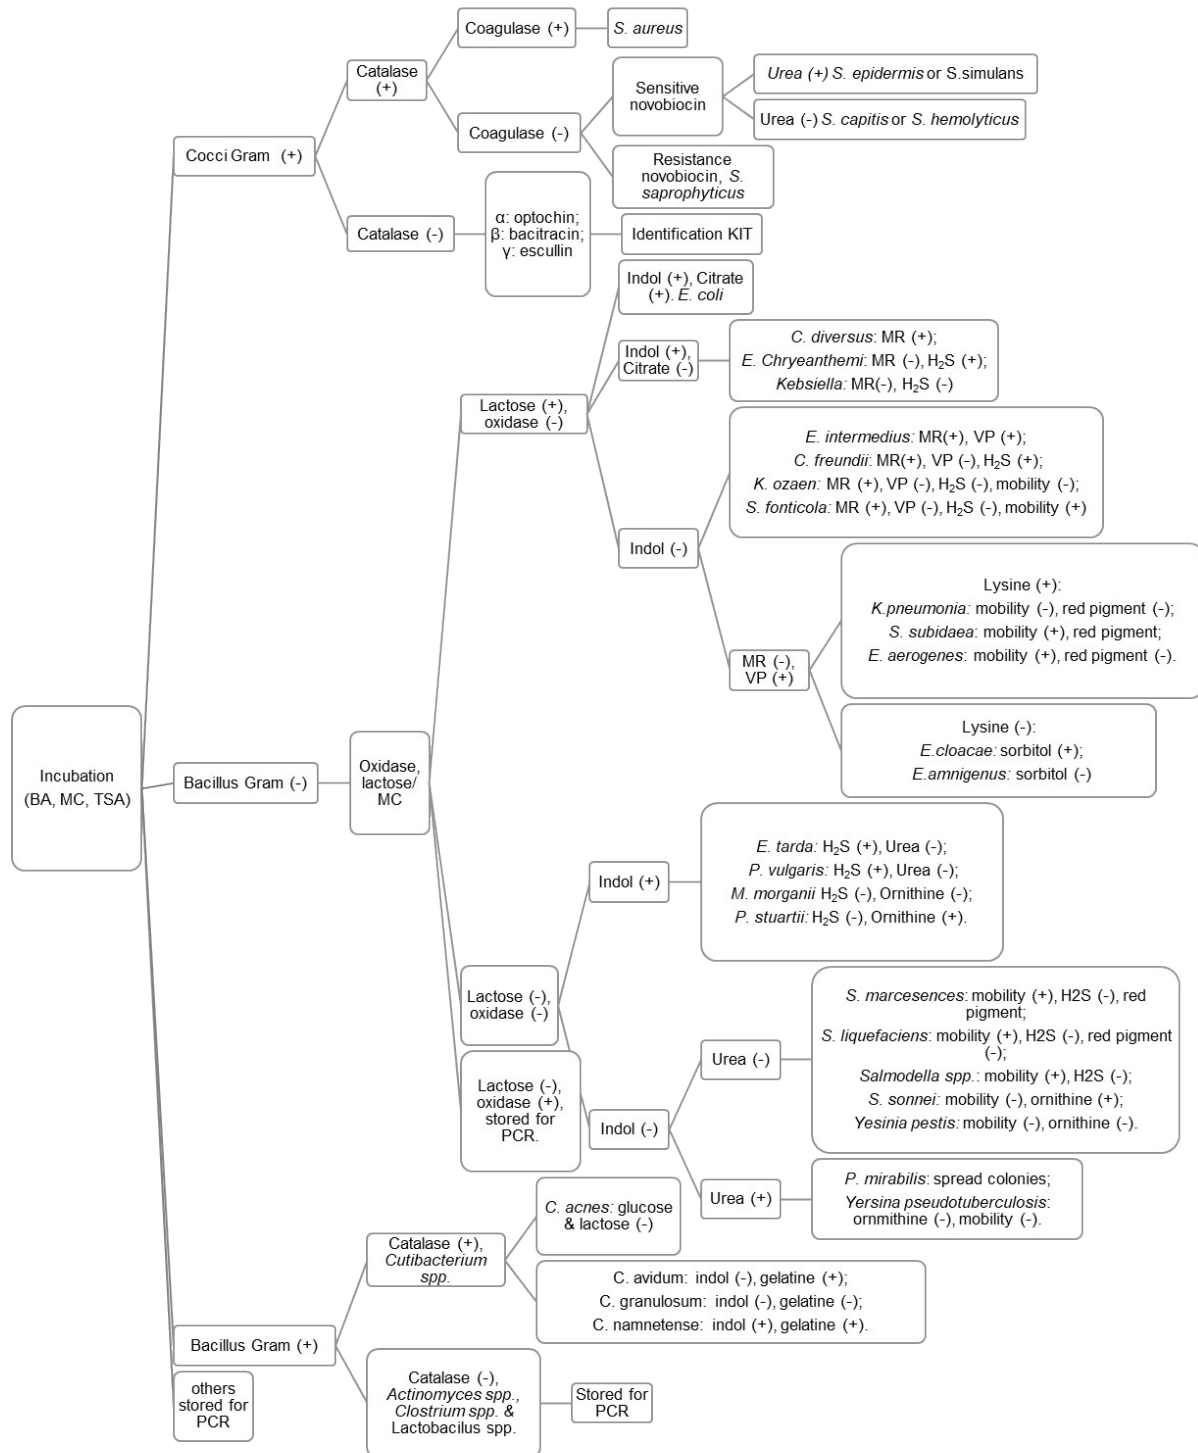

Graph S1. Biochemical identification of bacterial strains.

## 2. Qualify phase of antibacterial activity test

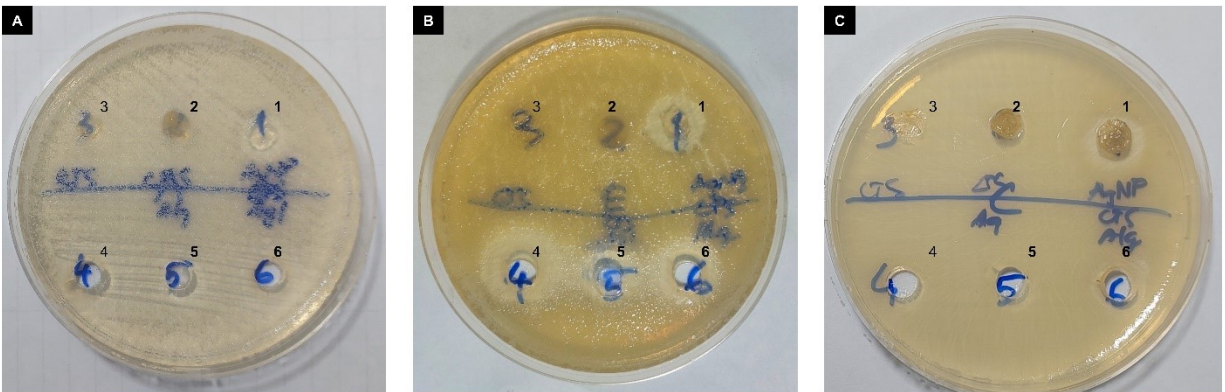

**Figure S1.** Quantify the antibacterial activity of the nanomaterials on bacterial strains.

Quantify the antibacterial activity of the nanomaterials on bacterial strains of (A) *S. aureus*, (B) *E. coli*, (C) *C. acnes* at (1) Silver nanoparticles-sodium alginate-chitosan film (2) Sodium alginate-chitosan film, (3) Chitosan film, (4) Chitosan solution, (5) Sodium alginate-chitosan solution, (6) Silver nanoparticles-chitosan solution.

Before determining the minimum inhibitory concentration (MIC) for application in antibacterial activity, it is essential to ensure that the material can inhibit bacterial growth during incubation [1]. Figure S1 demonstrates that the synthesized nanomaterial exhibits significant antibacterial activity. Building on these initial results, we proceeded with further testing to determine the MIC of the silver nanoparticles, the silver nanoparticle-chitosan solution, and the silver nanoparticle-sodium alginate-chitosan nanocomposite film.

### 3. Quantify phase of antibacterial activity test

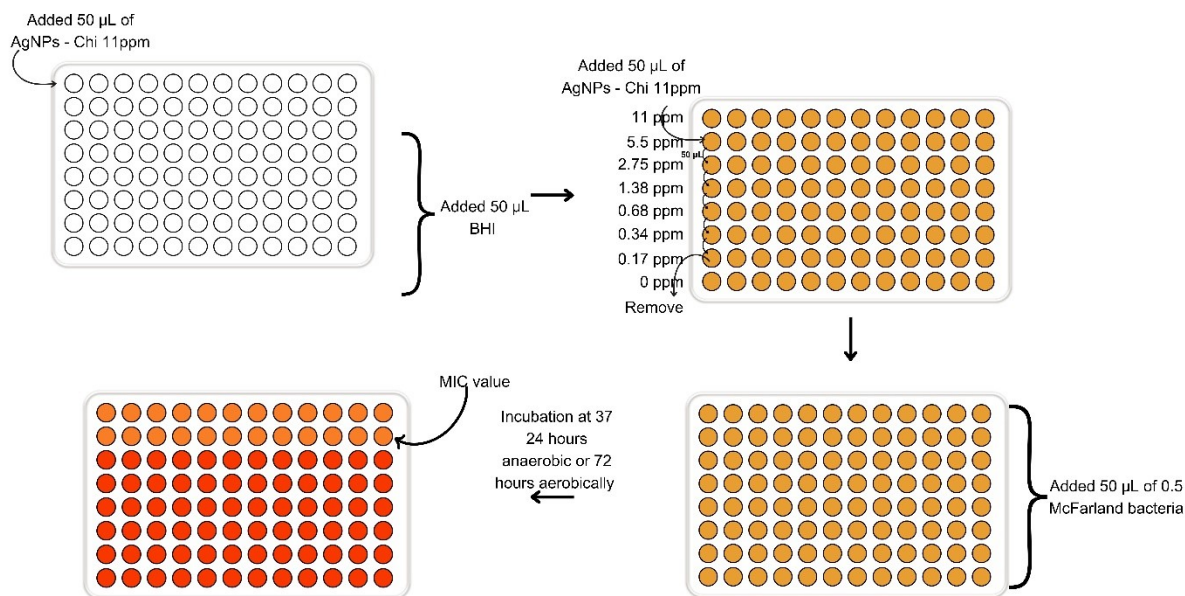

**Figure S2.** The serial dilution method uses 96-well agar plates to determine the minimum inhibitory concentration (MIC).

The serial dilution method on 96-well agar plates [8] to determine the minimum inhibitory concentration (MIC) was conducted in four main steps:

#### 1. Preparation of Positive Control and Broth Addition:

- Added 50  $\mu$ L of 11  $\mu$ g/mL silver nanoparticles or silver nanoparticle chitosan solution into the first row (Row A) of all 12 columns (positive control).
- Added 50  $\mu$ L of BHI broth for bacterial growth to each well in Row A.

#### 2. Serial Dilution:

- Added 50  $\mu$ L of 11  $\mu$ g/mL silver nanoparticles or silver nanoparticle chitosan solution into the second row (Row B).
- Mixed the solution, then removed 50  $\mu$ L from Row B, creating a 5.5  $\mu$ g/mL mixture (2-fold decrease in concentration).
- Repeatedly transferred 50  $\mu$ L of the mixed solution from each subsequent row to the next, up to Row G, ensuring each row has a 2-fold decrease in concentration.
- Row H served as the negative control.

**3. Bacterial Inoculation:** Added 50  $\mu$ L of a 0.5 McFarland concentration of bacteria into all wells.

**4. Incubation:** Incubated at 37°C for 24 hours under anaerobic conditions or 72 hours aerobically.

After incubation, the MIC value was determined as the lowest concentration at which no turbidity increase was observed in the wells.



#### 4. General and clinical characteristics of the study population

Our study involved 65 acne patients, and 26.15% of the patients had *C. acnes* isolated (Table S1).

**Table S1. Clinical characteristics of the study population.**

| Patient characteristic                  |                      | Total<br>(n = 65) |      | Patient samples<br>with <i>C. acnes</i><br>growth<br>(n = 17) |       | Patient samples<br>without <i>C. acnes</i><br>growth<br>(n = 48) |      | p <sup>a</sup>     |
|-----------------------------------------|----------------------|-------------------|------|---------------------------------------------------------------|-------|------------------------------------------------------------------|------|--------------------|
|                                         |                      | n                 | %    | n                                                             | %     | n                                                                | %    |                    |
| <b>General characteristics</b>          |                      |                   |      |                                                               |       |                                                                  |      |                    |
| Aged, mean ± SD (years)                 |                      | 19.86 ± 4.05      |      | 19.24 ± 3.15                                                  |       | 20.08 ± 4.33                                                     |      | 0.346 <sup>b</sup> |
| Female                                  |                      | 36                | 55.4 | 9                                                             | 52.9  | 8                                                                | 47.1 | 0.814              |
| Residence                               | City                 | 30                | 46.2 | 10                                                            | 58.8  | 20                                                               | 41.7 | 0.223              |
|                                         | Countryside          | 35                | 53.8 | 7                                                             | 41.7  | 28                                                               | 58.3 |                    |
| <b>Clinical characteristics</b>         |                      |                   |      |                                                               |       |                                                                  |      |                    |
| Length of illness (month), median (IQR) |                      | 12 (4 – 24)       |      | 6 (4 – 42)                                                    |       | 12 (3 – 24)                                                      |      | 0.844 <sup>c</sup> |
| Symptoms                                | None                 | 15                | 23.1 | 6                                                             | 35.3  | 9                                                                | 18.8 | 0.164              |
|                                         | Pain                 | 32                | 49.2 | 7                                                             | 41.2  | 25                                                               | 52.1 | 0.440              |
|                                         | Hot                  | 18                | 27.7 | 4                                                             | 23.5  | 14                                                               | 29.2 | 0.655              |
|                                         | Itchy                | 38                | 58.5 | 8                                                             | 47.1  | 30                                                               | 62.5 | 0.267              |
|                                         | Others               | 2                 | 3.1  | 0                                                             | 0.0   | 2                                                                | 4.2  | 0.393              |
| Number of symptoms                      | 0                    | 15                | 23.1 | 6                                                             | 35.3  | 9                                                                | 18.8 | 0.595              |
|                                         | 1                    | 19                | 29.2 | 5                                                             | 29.4  | 14                                                               | 29.2 |                    |
|                                         | 2                    | 23                | 35.4 | 4                                                             | 23.5  | 19                                                               | 39.6 |                    |
|                                         | 3                    | 7                 | 10.8 | 2                                                             | 11.8  | 5                                                                | 10.4 |                    |
|                                         | 4                    | 1                 | 1.5  | 0                                                             | 0.0   | 1                                                                | 2.1  |                    |
| Skin condition                          | Oily                 | 36                | 55.4 | 10                                                            | 58.5  | 26                                                               | 54.2 | 0.825              |
|                                         | Dry                  | 15                | 23.1 | 3                                                             | 17.6  | 12                                                               | 25.0 |                    |
|                                         | Sensitive            | 0                 | 0.0  | 0                                                             | 0.0   | 0                                                                | 0.0  |                    |
|                                         | Mixture              | 14                | 21.5 | 4                                                             | 23.5  | 10                                                               | 20.8 |                    |
| Acne type                               | Whiteheads           | 53                | 81.5 | 14                                                            | 82.4  | 39                                                               | 81.3 | 0.920              |
|                                         | Blackheads           | 32                | 49.2 | 9                                                             | 52.9  | 23                                                               | 47.9 | 0.722              |
|                                         | Papules              | 30                | 46.2 | 24                                                            | 50.0  | 6                                                                | 35.3 | 0.296              |
|                                         | Pustules             | 48                | 73.8 | 36                                                            | 75.0  | 12                                                               | 70.6 | 0.722              |
|                                         | Nodules              | 7                 | 10.8 | 1                                                             | 5.9   | 6                                                                | 12.5 | 0.449              |
|                                         | Pseudocysts          | 1                 | 1.5  | 1                                                             | 5.9   | 0                                                                | 0.0  | 0.090              |
| Number of acne-type                     | 1                    | 6                 | 9.2  | 2                                                             | 11.8  | 4                                                                | 8.3  | 0.925              |
|                                         | 2                    | 28                | 43.1 | 8                                                             | 47.1  | 20                                                               | 41.7 |                    |
|                                         | 3                    | 15                | 23.1 | 3                                                             | 17.6  | 12                                                               | 25.0 |                    |
|                                         | 4                    | 15                | 23.1 | 4                                                             | 23.5  | 11                                                               | 22.9 |                    |
|                                         | 5                    | 1                 | 1.5  | 0                                                             | 0.0   | 1                                                                | 2.1  |                    |
| Acne location                           | Face                 | 64                | 98.5 | 17                                                            | 100.0 | 47                                                               | 97.9 | 0.549              |
|                                         | Chest                | 18                | 27.7 | 7                                                             | 41.2  | 11                                                               | 22.9 | 0.148              |
|                                         | Neck                 | 8                 | 12.3 | 3                                                             | 17.6  | 5                                                                | 10.4 | 0.436              |
|                                         | Dorsum               | 23                | 35.4 | 8                                                             | 47.1  | 15                                                               | 31.3 | 0.241              |
| Sequelae                                | None                 | 38                | 58.5 | 12                                                            | 70.6  | 26                                                               | 54.2 | 0.238              |
|                                         | Pigmentation changes | 22                | 33.8 | 4                                                             | 23.5  | 18                                                               | 37.5 | 0.296              |
|                                         | Scar                 | 4                 | 6.2  | 2                                                             | 11.8  | 2                                                                | 4.2  | 0.263              |
|                                         | Keloids              | 7                 | 10.8 | 0                                                             | 0.0   | 7                                                                | 14.6 | 0.096              |

|                    |                    |    |      |    |      |    |      |        |
|--------------------|--------------------|----|------|----|------|----|------|--------|
| Karen McCoy degree | Mild               | 38 | 58.5 | 10 | 58.8 | 28 | 58.3 | 0.588  |
|                    | Moderate           | 19 | 29.2 | 6  | 35.3 | 13 | 27.1 |        |
|                    | Severe             | 8  | 12.3 | 1  | 5.9  | 7  | 14.6 |        |
| Medical history    | None               | 23 | 35.4 | 10 | 58.8 | 13 | 27.1 | 0.019* |
|                    | Self-treatment     | 7  | 10.8 | 2  | 11.8 | 5  | 10.4 | 0.878  |
|                    | Privacy Healthcare | 16 | 24.6 | 1  | 5.9  | 15 | 31.3 | 0.037* |
|                    | Public Healthcare  | 17 | 26.2 | 4  | 23.5 | 13 | 27.1 | 0.774  |

*SD: Standard deviation, IQR: Interquartile range; p: 2-tailed significant; <sup>a</sup>: Pearson Chi-squared test; <sup>b</sup>: Independent Samples T-test; <sup>c</sup>: Mann-Whitney U test; \*:  $p < 0.05$ .*

Our study population primarily consisted of females aged 13-24, with an average age of  $19.28 \pm 4.05$  years (Table S1). The general characteristics observed were similar to those reported by Giavina-Bianchi *et al.* (2022) [9] and Skroza *et al.* (2018) [10]. In Skroza *et al.*'s (2018) study of 1,167 patients, the majority population was female (85%). Giavina-Bianchi *et al.* (2022) [9] assessed 2,459 acne patients, with the majority being female (69.3%) and aged between 13-24 (67.2%). In our study, patients from urban areas accounted for 46.2%, while those from rural areas made up 53.8%. Regarding previous medical treatment, 35.4% had no prior treatment, 10.8% practiced self-treatment, 26.2% received public healthcare, and 24.6% used private healthcare. The medical history of previous treatment differed from Giavina-Bianchi *et al.* (2022) [9], likely due to differences in healthcare access and population characteristics.

The most common clinical symptoms in our study were itching (58.5%) and pain (49.2%) (Table S1), with an average acne duration of approximately 12 months. According to Karen McCoy's acne severity scale, the majority of patients had mild acne (58.5%), and 98.5% of the patients had facial acne (Table S1). Oily skin was the most prevalent (55.4%), followed by dry skin (23.1%) and combination skin (21.5%). The types of acne observed were diverse, with whiteheads being the most common (81.5%), followed by pustules (49.2%), papules (46.2%), nodules (10.8%), and cysts (1.5%) (Table S1). The present clinical characteristics were consistent with those reported by Giavina-Bianchi *et al.* (2022) [9] and Skroza *et al.* (2018) [10]. Giavina-Bianchi *et al.* (2022) noted that the majority of acne was located on the head and neck (86.1%), with mild (28.1%) and moderate (53.5%) severity [9]. Similarly, Skroza *et al.* (2018) found that the majority of their 1,167 patients had mild acne [10]. Thus, our study population shares similar characteristics with these previous studies, supporting its use as a reference demographic for other acne research.

## 5. Antibacterial activity of silver nanoparticles-sodium alginate-chitosan nanocomposite films

Figure S3 illustrates examples of the quantified antibacterial tests of the AgNPs and Ag-Chi solutions conducted using the serial dilution method. All MIC values have been calculated, and analyzed, and are presented in Figure 8 of the manuscript.

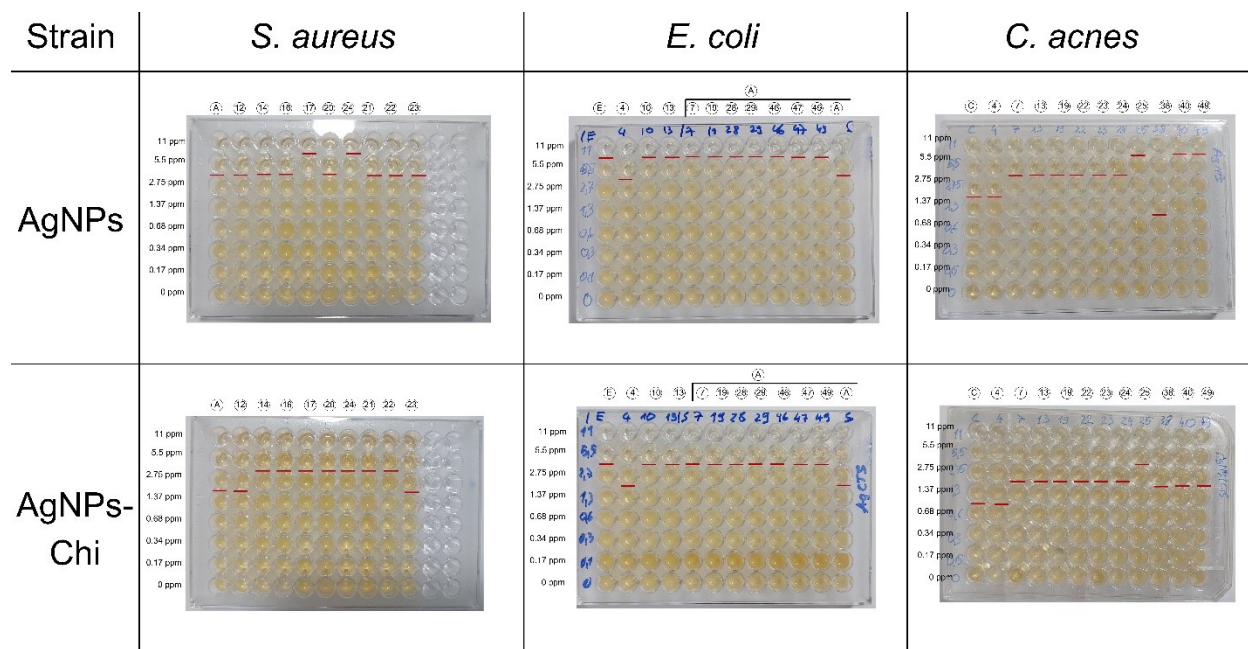

**Figure S3.** Quantify the minimal inhibitory concentration (MIC) of silver nanoparticles-, and silver nanoparticles-chitosan- solutions through the serial dilution method.

*AgNPs*: silver nanoparticles solution, *AgNPs-Chi*: silver nanoparticles chitosan solution, *A*: pure strain of *S. aureus*, *E*: pure strain of *E. coli*, *C*: pure strain *C. acnes*, *No.*: patient's number that collected the bacterial, *redline*: MIC value of samples.

Figure S4 showcases the quantified antibacterial tests of silver nanoparticle-sodium alginate-chitosan nanocomposite films using the Kirby-Bauer disc diffusion method. The MIC values have been recorded, analyzed, and are presented in Table 2 of the manuscript.

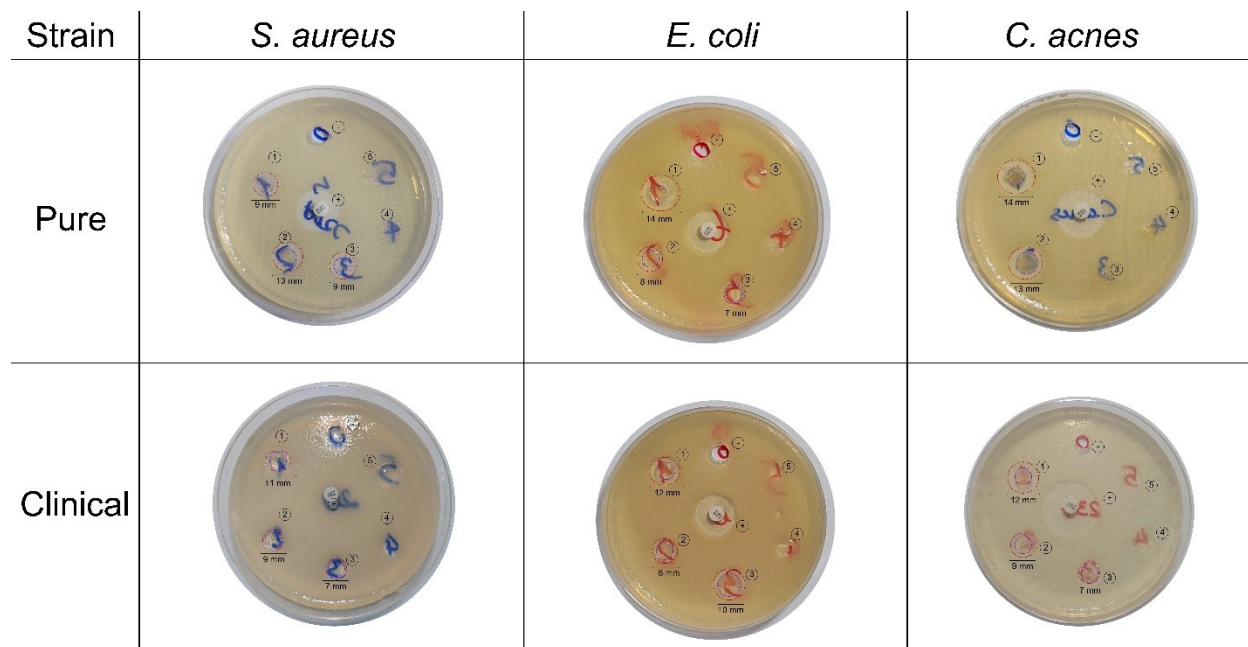

**Figure S4.** Quantify the minimal inhibitory concentration value of silver nanoparticle-sodium alginate-chitosan nanocomposite films through the Kirby-Bauer disc diffusion method.

*S. aureus*: *Staphylococcus aureus*, *E. coli*: *Escherichia coli*, *C. acnes*: *Cutibacterium acnes*, +: positive control, -: negative control, blue circles: 6mm cut of the films, red circles: MIC value and the sterile diameter ring.

## REFERENCES

1. Vietnam Ministry of Health, *Practical guide to clinical microbiology techniques* Issued together with Decision No. 6769/QD-BYT dated November 8, 2018. <https://kcb.vn/upload/2005611/20210723//Q%C4%90-ban-h%C3%A0nh-HD-QTKTVi-sinh-2018-2.pdf>
2. R. Polugari, S.R. Marla, D. Shailaja, Isolation and Molecular Characterization of acne causing *Propionibacterium acnes*. *Int. J. Sci. Res.* 2016, **6**, 809-814.
3. N. Tripathi, A. Sapra, Gram Staining. *StatPearls*. Updated 2023 Aug 14. 2024 <https://www.ncbi.nlm.nih.gov/books/NBK562156/>.
4. G. Panja, S.K. Ghosh, Modified Kligler's Iron Agar Medium for the Isolation of Intestinal Pathogens. *Ind. Med. Gaz.* 1945, **80**, 202-204.
5. W.C. Tsai, C.M. Tarng, J. King, C.D. Ko, H.J. Wu, Evaluation on the capability of indole pyruvic acid production by members of Proteaeae on different brands of sulfide-indole-motility. *Zhonghua Min Guo Wei Sheng Wu Ji Mian Yi Xue Za Zhi.* 1988, **21**, 117-24.
6. M. Levine, D.C. Carpenter, Gelatin Liquefaction by Bacteria. *J. Bacteriol.* 1923, **8**, 297-306.
7. A.L. Barry, K.L. Feeney, Two quick methods for Voges-Proskauer test. *Appl. Microbiol.*, 1967, **15(5)**, 1138-41.
8. A.K. Tiwari, K.R. Mishra, A. Kumar, S. Srivastava, A. Dikshit, A. Pandey, K. Bajaj, A comparative novel method of antifungal susceptibility for *Malassezia furfur* and modification of culture medium by adding lipid supplement. *J. Phytol.* 2011, **3**, 44-52.
9. M. Giavina-bianchi, M.F.D. Azevedo, E. Cordioli, Clinical Features of Acne in Primary Care Patients Assessed Through Tele dermatology. *J. Prim. Care Community Health.* 2022, **13**, 1–8.
10. N. Skroza, E. Tolino, A. Mambrin, S. Zuber, V. Balduzzi, A. Marchesiello, N-T. Bernardini, I. Proietti, C. Potenza. Adult Acne Versus Adolescent Acne: A Retrospective Study of 1,167 Patients. *J. Clin. Aesthet. Dermatol.* 2018, **11**, 21–25.
